# Supplementary material for: VEGFR2 Translocates to the Nucleus to Regulate Its Own Transcription
Source: PLoS One. 2011 Sep 28;6(9):e25668. doi: 10.1371/journal.pone.0025668 (PMC3182252; doi:10.1371/journal.pone.0025668)
Supplement: Table S1 — VEGFR2‐interacting proteins as identified by MS analysis. Proteins listed according to their Mascot score. (XLS) [file pone.0025668.s004.xls]

## Sheet: CorrectedNames.txt
Hit	Mascot S.	Original ID	Description	EnsenblID		kDa	Cover (%)	unique/ total peptides
1	4887	MYH9_HUMAN	Myosin-9 - Homo sapiens (Human)	ENSG00000100345	DFNA17,EPSTS,FTNS,MHA,NMHC-II-A,NMMHCA	227.646	43.7	76/138
2	1951	PLEC1_HUMAN	Plectin-1 - Homo sapiens (Human)	ENSG00000178209	PLEC1	533.404	11.8	41/44
3	1628	MYO1C_HUMAN	Myosin-Ic - Homo sapiens (Human)	ENSG00000197879	myr2	118.763	26.6	23/42
4	1627	FIBB_HUMAN	Fibrinogen beta chain precursor - Homo sapiens (Human)	ENSG00000171564	FIBB	56.577	45.8	25/27
5	1122	MYH10_HUMAN	Myosin-10 - Homo sapiens (Human)	ENSG00000133026	NMMHCB	229.824	11.3	19/32
6	965	FIBA_HUMAN	Fibrinogen alpha chain precursor - Homo sapiens (Human)	ENSG00000171560	FIBA	95.656	22.9	16/21
7	955	FIBG_HUMAN	Fibrinogen gamma chain precursor - Homo sapiens (Human)	ENSG00000171557	FIBG	52.106	41.1	14/17
8	878	SFPQ_HUMAN	Splicing factor, proline- and glutamine-rich - Homo sapiens (Human)	ENSG00000116560	PSF	76.216	24.8	12/16
9	712	PABP1_HUMAN	Polyadenylate-binding protein 1 - Homo sapiens (Human)	ENSG00000070756	PABP1	70.854	23.1	11/12
10	687	A26CA_HUMAN	ANKRD26-like family C member 1A - Homo sapiens (Human)	NA	NA	122.882	12.1	10/44
11	674	TMOD3_HUMAN	Tropomodulin-3 - Homo sapiens (Human)	ENSG00000138594	UTMOD	39.741	34.1	9/9
12	642	RBM14_HUMAN	RNA-binding protein 14 - Homo sapiens (Human)	ENSG00000239306	COAA,DKFZp779J0927,SIP,SYTIP1	69.62	15.8	9/10
13	634	CAZA1_HUMAN	F-actin-capping protein subunit alpha-1 - Homo sapiens (Human)	ENSG00000116489	CAZA1	33.073	48.3	8/9
14	622	HNRPL_HUMAN	Heterogeneous nuclear ribonucleoprotein L - Homo sapiens (Human)	ENSG00000104824	HNRPL	60.719	31.7	11/14
15	618	DREB_HUMAN	Drebrin - Homo sapiens (Human)	ENSG00000113758	DREB	71.838	15.6	7/19
16	595	MYH14_HUMAN	Myosin-14 - Homo sapiens (Human)	ENSG00000105357	DFNA4,FLJ13881,KIAA2034,MHC16,MYH17	228.889	7.7	13/25
17	504	K2C6C_HUMAN	Keratin, type II cytoskeletal 6C - Homo sapiens (Human)	ENSG00000170465	K2C6C	60.273	17.2	8/9
18	490	RAI14_HUMAN	Ankycorbin - Homo sapiens (Human)	ENSG00000039560	DKFZp564G013,KIAA1334,NORPEG,RAI13	110.601	15.5	10/11
19	481	CYTSA_HUMAN	Cytospin-A - Homo sapiens (Human)	ENSG00000100014	KIAA0376,SPECC1L	124.915	15.8	11/11
20	464	DDX3X_HUMAN	ATP-dependent RNA helicase DDX3X - Homo sapiens (Human)	ENSG00000215301	DBX,DDX14,DDX3,HLP2	73.597	20.8	9/10
21	457	RL7_HUMAN	60S ribosomal protein L7 - Homo sapiens (Human)	ENSG00000147604	RL7	29.264	29.8	10/11
22	420	FBRL_HUMAN	rRNA 2apos;-O-methyltransferase fibrillarin - Homo sapiens (Human)	ENSG00000105202	FBRL	33.877	30.5	7/11
23	418	RS3_HUMAN	40S ribosomal protein S3 - Homo sapiens (Human)	ENSG00000149273	RS3	26.842	34.2	6/6
24	394	HNRDL_HUMAN	Heterogeneous nuclear ribonucleoprotein D-like - Homo sapiens (Human)	ENSG00000152795	HNRDL	46.58	18.6	7/14
25	392	LUZP1_HUMAN	Leucine zipper protein 1 - Homo sapiens (Human)	ENSG00000169641	LUZP	120.772	16.6	13/15
26	391	LIMA1_HUMAN	LIM domain and actin-binding protein 1 - Homo sapiens (Human)	ENSG00000050405	EPLIN	85.63	15.4	8/9
27	383	GELS_HUMAN	Gelsolin precursor - Homo sapiens (Human)	ENSG00000148180	GELS	86.043	10.9	5/8
28	380	K2C5_HUMAN	Keratin, type II cytoskeletal 5 - Homo sapiens (Human)	ENSG00000186081	K2C5	62.568	15.4	8/17
29	366	GNAI2_HUMAN	Guanine nucleotide-binding protein G(i), alpha-2 - Homo sapiens (Human)	ENSG00000114353	GIP,GNAI2B	40.995	23.4	6/6
30	356	EZRI_HUMAN	Ezrin - Homo sapiens (Human)	ENSG00000092820	EZRI	69.484	13.1	7/7
31	342	DESM_HUMAN	Desmin - Homo sapiens (Human)	ENSG00000175084	DESM	53.56	16.4	8/18
32	340	CV028_HUMAN	UPF0027 protein C22orf28 - Homo sapiens (Human)	ENSG00000100220	CV028	55.688	15.0	6/8
33	298	PP1G_HUMAN	Serine/threonine-protein phosphatase PP1-gamma- Homo sapiens (Human)	ENSG00000186298	PP1G	37.701	16.1	4/4
34	294	RL10A_HUMAN	60S ribosomal protein L10a - Homo sapiens (Human)	ENSG00000198755	RL10A	24.987	30.4	6/6
35	292	5NTD_HUMAN	5apos;-nucleotidase precursor - Homo sapiens (Human)	ENSG00000135318	5NTD	63.898	14.1	5/6
36	266	RS4X_HUMAN	40S ribosomal protein S4, X isoform - Homo sapiens (Human)	ENSG00000198034	RS4X	29.807	16.7	4/5
37	265	RRBP1_HUMAN	Ribosome-binding protein 1 - Homo sapiens (Human)	ENSG00000125844	ES/130,hES	152.78	5.8	5/6
38	265	K2C75_HUMAN	Keratin, type II cytoskeletal 75 - Homo sapiens (Human)	ENSG00000170454	K2C75	59.753	13.2	6/22
39	264	K1109_HUMAN	Uncharacterized protein KIAA1109 - Homo sapiens (Human)	ENSG00000138688	K1109	559.165	5.5	15/29
40	261	MBB1A_HUMAN	Myb-binding protein 1A - Homo sapiens (Human)	ENSG00000132382	MBB1A	149.731	6.9	6/6
41	257	SYNE2_HUMAN	Nesprin-2 - Homo sapiens (Human)	ENSG00000054654	DKFZP434H2235,KIAA1011,Nesprin-2,NUA,NUANCE,SYNE-2	801.817	3.8	16/18
42	251	BUB3_HUMAN	Mitotic checkpoint protein BUB3 - Homo sapiens (Human)	ENSG00000154473	BUB3L	37.587	11.0	3/3
43	235	PCBP2_HUMAN	Poly(rC)-binding protein 2 - Homo sapiens (Human)	ENSG00000197111	hnRNP-E2,HNRPE2	38.955	24.4	5/14
44	235	NIN_HUMAN	Ninein - Homo sapiens (Human)	ENSG00000100503		245.249	5.1	10/16
45	234	PABP4_HUMAN	Polyadenylate-binding protein 4 - Homo sapiens (Human)	ENSG00000090621	PABP4	71.08	10.4	5/5
46	233	THIL_HUMAN	Acetyl-CoA acetyltransferase, mitochondrial precursor - Homo sapiens (Human)	ENSG00000075239	THIL	45.456	16.2	4/4
47	228	IGHG2_HUMAN	Ig gamma-2 chain C region - Homo sapiens (Human)	ENSG00000211893	IGHG2	36.489	17.8	3/4
48	223	AMPN_HUMAN	Aminopeptidase N - Homo sapiens (Human)	ENSG00000166825	AMPN	109.87	9.2	7/8
49	221	RS2_HUMAN	40S ribosomal protein S2 - Homo sapiens (Human)	ENSG00000140988	RS2	31.59	15.4	4/5
50	215	JHD2B_HUMAN	JmjC domain- histone demethylation protein 2B - Homo sapiens (Human)	NA	NA	193.202	7.8	9/12
51	210	BRE1A_HUMAN	E3 ubiquitin-protein ligase BRE1A - Homo sapiens (Human)	ENSG00000155827	BRE1A	114.22	8.5	8/9
52	203	DYH8_HUMAN	Dynein heavy chain 8, axonemal - Homo sapiens (Human)	ENSG00000124721	DYH8	517.984	5.3	13/14
